# Supplementary material for: Insight into the relationship between redox ability and separation efficiency via the case of α-Bi2O3/Bi5NO3O7
Source: Royal Society of Chemistry journal article supplement (doi:10.1039/d2qi00731b), 2022-01-01
Supplement: d2qi00731b1.pdf [file d2qi00731b1.pdf]

## Supplementary Information

### Insight into the relationship of redox ability and separation efficiency via the case of $\alpha$ -Bi<sub>2</sub>O<sub>3</sub>/Bi<sub>5</sub>NO<sub>3</sub>O<sub>7</sub>

Jie-hao Li<sup>a,b,#</sup>, Rui-hong Liu<sup>a,c,#</sup>, Meng Ning<sup>a,c</sup>, Yi-lei Li<sup>a,c</sup>, Ying Liu<sup>a,c</sup>, Xinying Liu<sup>d\*</sup>,  
Phathutshedzo Khangale<sup>b</sup>, Diane Hildebrandt<sup>e</sup>, Xiao-jing Wang<sup>a,c</sup>, Fa-tang Li<sup>a,c\*</sup>

<sup>a</sup> International Joint Laboratory of New Energy, Hebei University of Science and Technology, Shijiazhuang 050018, China

<sup>b</sup> Department of Chemical Engineering, University of Johannesburg, Johannesburg 2028, South Africa

<sup>c</sup> Hebei Key Laboratory of Photoelectric Control on Surface and Interface, College of Science, Hebei University of Science and Technology, Shijiazhuang 050018, China.

<sup>d</sup> Institute for the Development of Energy for African Sustainability (IDEAS), University of South Africa (UNISA), Florida 1710, South Africa.

<sup>e</sup> African Energy Leadership Centre, WITS Business School & Molecular Science Institute, School of Chemistry, University of Witwatersrand, Johannesburg, 2050, South Africa

## Experimental

### Characterization of catalysts

Photoelectrochemical measurements were measured on an electrochemical workstation (Chenhua CHI-660E). The instrument contains a three-electrode quartz cell, with a platinum electrode as the counter electrode, an Ag/AgCl electrode as the reference electrode, and a conductive glass plate (ITO) coated with the samples as the working electrode. The electrolyte was a 0.2 mol/L Na<sub>2</sub>SO<sub>4</sub> aqueous solution, and simulated visible-light and ultraviolet light were provided by a 300 W Xe lamp (UV filter or  $\lambda > 400\text{nm}$  filter).

**Table S1.** The fitted lifetimes and the corresponding percentage of BNO, 0.744BBNO and  $\alpha\text{-Bi}_2\text{O}_3$

| Sample                         | $\tau_1(\text{ns})$ | $P_1(\%)$ | $\tau_2(\text{ns})$ | $P_2(\%)$ | $\tau_3(\text{ns})$ | $P_3(\%)$ | $\tau_{\text{ave}}$ |
|--------------------------------|---------------------|-----------|---------------------|-----------|---------------------|-----------|---------------------|
| BNO                            | 0.0767              | 52.37     | 1.9168              | 31.78     | 9.0695              | 15.85     | 6.81                |
| 0.744BBNO                      | 0.1814              | 44.43     | 2.2732              | 36.09     | 11.5537             | 19.47     | 8.85                |
| $\alpha\text{-Bi}_2\text{O}_3$ | 0.0391              | 39.93     | 1.8974              | 40.61     | 9.2643              | 19.46     | 7.02                |

**Table S2.** The Zeta potential of BNO, 0.744BBNO and  $\alpha$ -Bi<sub>2</sub>O<sub>3</sub>

| <b>Sample</b>                            | <b>Zeta potential (mV)</b> |
|------------------------------------------|----------------------------|
| BNO                                      | -40.3                      |
| 0.744BBNO                                | -23.6                      |
| $\alpha$ -Bi <sub>2</sub> O <sub>3</sub> | -19.3                      |

**Table S3.** A comparison of the scientific value of the current work with the existing literature.

| Sample                                                                                  | Pollutant concentration        | Degradation activity                                                                                                                                                               | Reason                                                                                                                                                        | Reference |
|-----------------------------------------------------------------------------------------|--------------------------------|------------------------------------------------------------------------------------------------------------------------------------------------------------------------------------|---------------------------------------------------------------------------------------------------------------------------------------------------------------|-----------|
| 2%Mo-BiOBr                                                                              | 10 mg/L sulfanilamide solution | 2%Mo-BiOBr is 4.7 times higher than pure BiOBr                                                                                                                                     | Doping improves separation efficiency                                                                                                                         | 1         |
| BCN-200/rGO                                                                             | 10 mg/L CIP                    | BCN-200/rGO is 9.0 times higher than pure Bi <sub>2</sub> WO <sub>6</sub> , 2.1 times of pure g-C <sub>3</sub> N <sub>4</sub>                                                      | Improved separation efficiency                                                                                                                                | 2         |
| Bi <sub>2</sub> MoO <sub>6</sub> /Ti <sub>3</sub> C <sub>2</sub>                        | TC                             | Bi <sub>2</sub> MoO <sub>6</sub> /Ti <sub>3</sub> C <sub>2</sub> is 8.8 times higher than pure Bi <sub>2</sub> MoO <sub>6</sub> , 1.3 times of pure Ti <sub>3</sub> C <sub>2</sub> | Heterojunction improves separation efficiency                                                                                                                 | 3         |
| $\beta$ -Bi <sub>2</sub> O <sub>3</sub> /Bi <sub>2</sub> O <sub>2</sub> CO <sub>3</sub> | 10 mg/L RhB                    | Heterojunction is high activity in Vis-light, but pure Bi <sub>2</sub> O <sub>2</sub> CO <sub>3</sub> is high activity under UV-light.                                             | The upward shift of the valence band of Bi <sub>2</sub> O <sub>2</sub> CO <sub>3</sub> reduces the oxidation capacity, but improves the separation efficiency | 4         |

---

|                                                               |                               |                                                                                                    |                                     |         |
|---------------------------------------------------------------|-------------------------------|----------------------------------------------------------------------------------------------------|-------------------------------------|---------|
|                                                               |                               | $\text{Bi}_3\text{O}_4\text{Br}/\alpha\text{-Bi}_2\text{O}_3$                                      |                                     |         |
|                                                               |                               | is 11.6 times                                                                                      |                                     |         |
|                                                               |                               | higher than pure                                                                                   | The downward                        |         |
|                                                               |                               | $\text{Bi}_3\text{O}_4\text{Br}$ , 5.2                                                             | movement of the                     |         |
|                                                               |                               | times of pure $\alpha\text{-Bi}_2\text{O}_3$                                                       | $\text{Bi}_2\text{O}_3$ VB position |         |
| $\text{Bi}_3\text{O}_4\text{Br}/\alpha\text{-Bi}_2\text{O}_3$ | 10 mg/L MO,<br>50 mg/L Phenol | $\text{Bi}_2\text{O}_3$ under MO;<br>$\text{Bi}_3\text{O}_4\text{Br}/\alpha\text{-Bi}_2\text{O}_3$ | improves its oxidation              |         |
|                                                               |                               | is 1.4 times                                                                                       | capacity, but reduces               | 5       |
|                                                               |                               | higher than pure                                                                                   | the separation                      |         |
|                                                               |                               | $\text{Bi}_3\text{O}_4\text{Br}$ , 3.3                                                             | efficiency of the                   |         |
|                                                               |                               | times of pure $\alpha\text{-Bi}_2\text{O}_3$                                                       | photogenerated                      |         |
|                                                               |                               | under                                                                                              | carriers                            |         |
|                                                               |                               | phenol                                                                                             |                                     |         |
|                                                               |                               | $\text{FeV}_2\text{O}_4\text{-Bi}_2\text{O}_3$ is                                                  |                                     |         |
|                                                               |                               | 7 times higher                                                                                     | $\text{FeV}_2\text{O}_4$ decorated  |         |
|                                                               |                               | than pure                                                                                          | $\text{Bi}_2\text{O}_3$ improves    | 6       |
| $\text{FeV}_2\text{O}_4\text{-Bi}_2\text{O}_3$                | 25 mg/L MB                    | $\text{FeV}_2\text{O}_4$ , 4.6                                                                     | separation efficiency               |         |
|                                                               |                               | times of pure                                                                                      |                                     |         |
|                                                               |                               | $\text{Bi}_2\text{O}_3$                                                                            |                                     |         |
|                                                               |                               | Heterojunction                                                                                     | Heterojunction                      |         |
| 0.744BBNO                                                     | 10 mg/L RhB,<br>20 mg/L TC    | activity is lower                                                                                  | formation reduces the               | Present |
|                                                               |                               | than pure                                                                                          | ability to generate                 | study   |
|                                                               |                               | substances                                                                                         | reactive species                    |         |

---

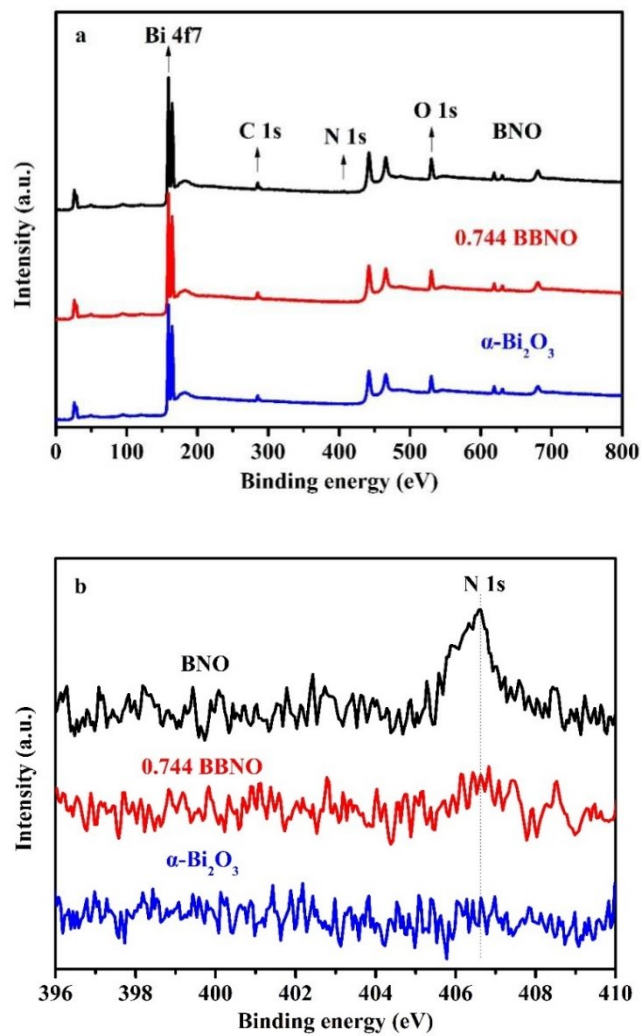

**Fig. S1.** a) XPS spectra and b) N 1s high resolution XPS spectra over BNO, 0.744BBNO and  $\alpha$ - $\text{Bi}_2\text{O}_3$  samples.

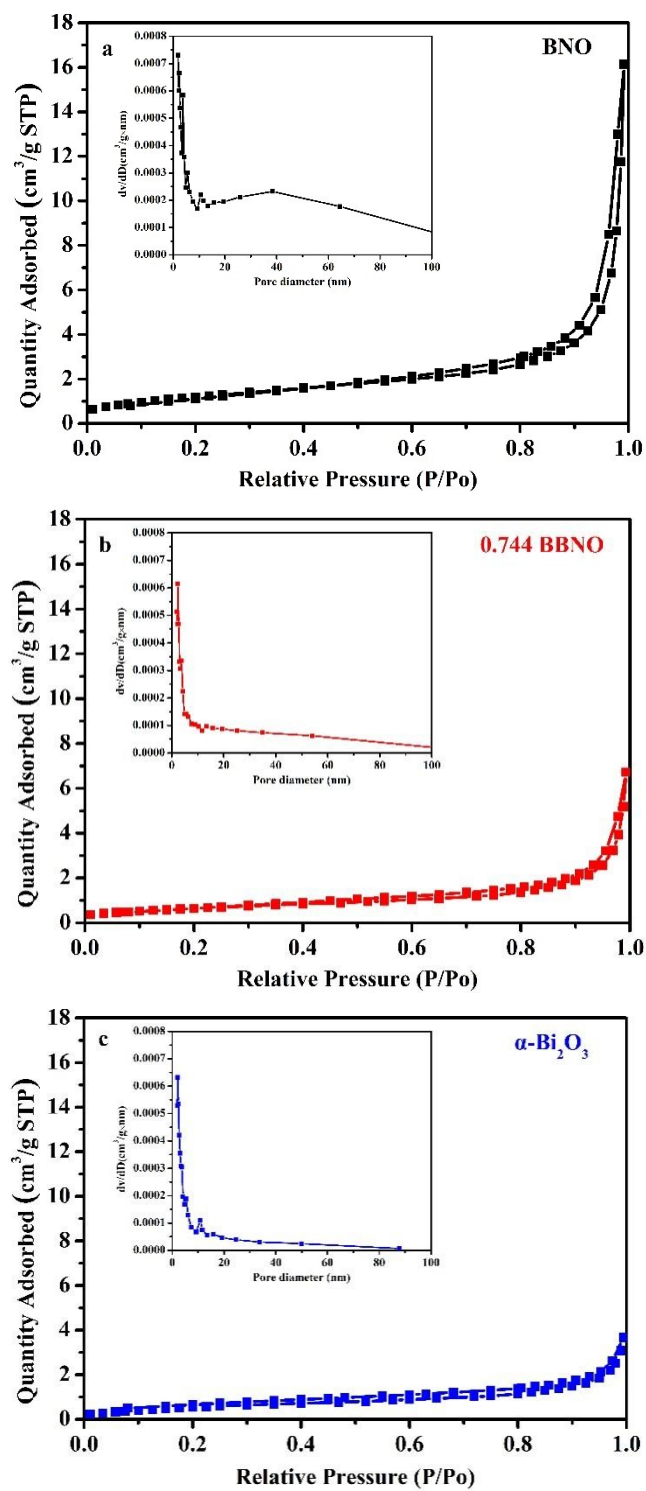

**Fig. S2.** a), b) and c): Nitrogen adsorption-desorption isotherms and pore size distributions of the BNO, 0.744BBNO and  $\alpha\text{-Bi}_2\text{O}_3$  samples.

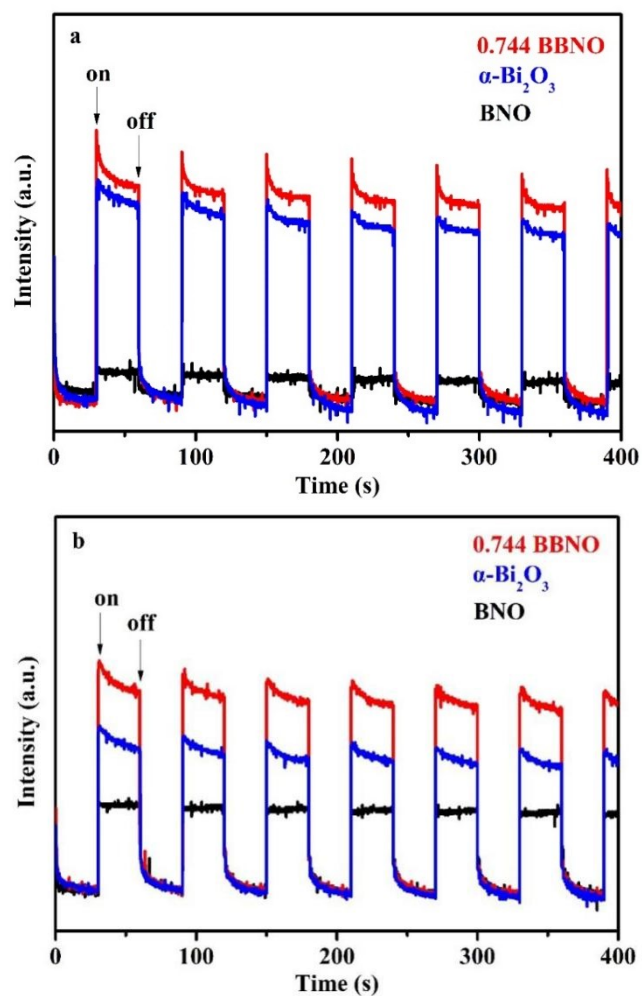

**Fig. S3.** a) Visible-light and b) UV-light transient photocurrent plots of the BNO, 0.744BBNO and  $\alpha$ -Bi<sub>2</sub>O<sub>3</sub> samples.

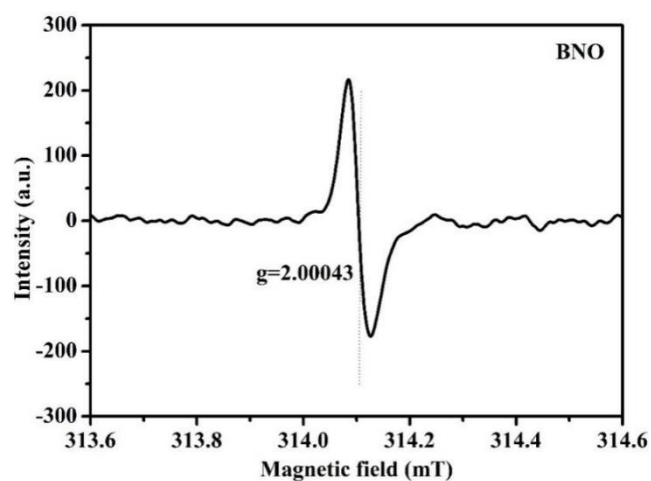

**Fig. S4.** Solid state EPR patterns of BNO.



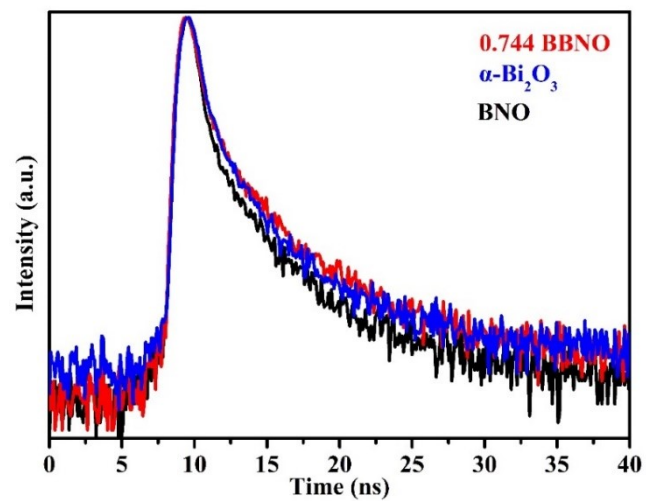

**Fig. S5.** Transient fluorescence of the BNO, 0.744BBNO and  $\alpha$ -Bi<sub>2</sub>O<sub>3</sub> samples.

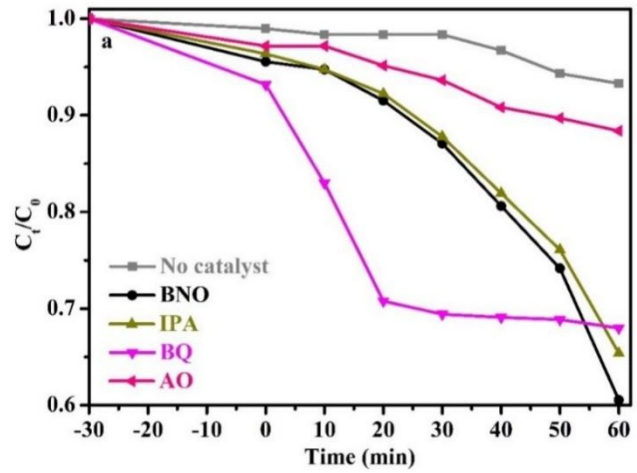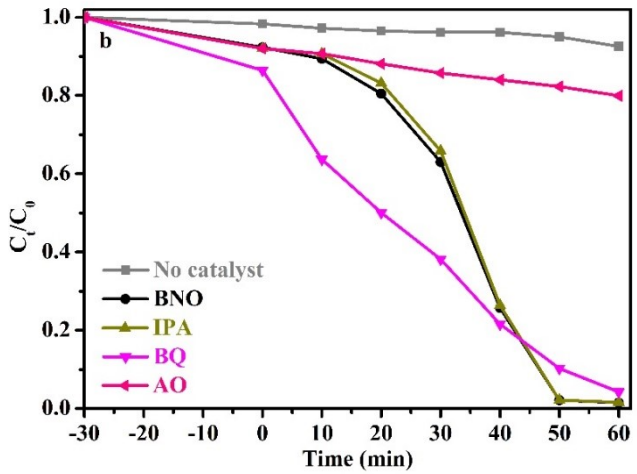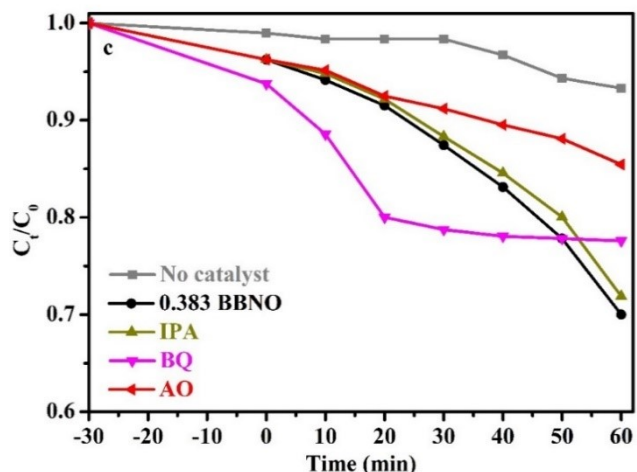

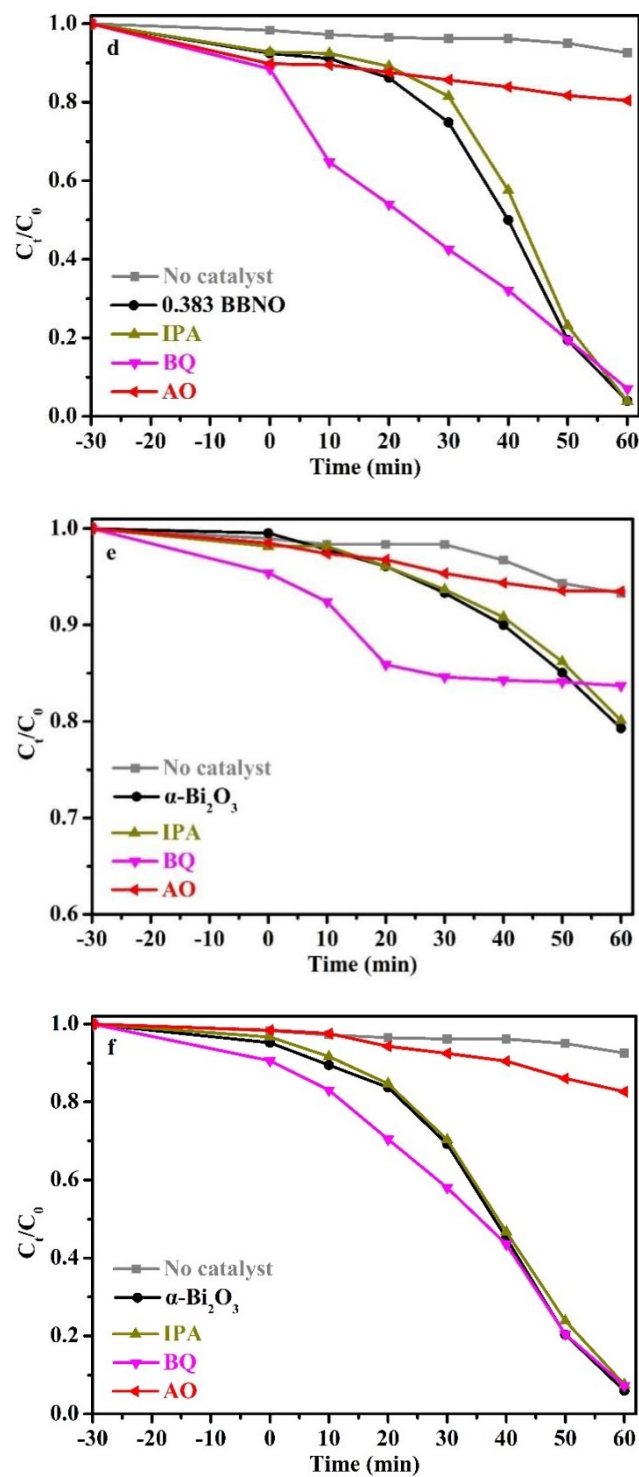

**Fig. S6.** a), c) and e): Scavenger experiments (RhB) of BNO, 0.383BBNO and  $\alpha$ -Bi<sub>2</sub>O<sub>3</sub> under Vis-light. b), d) and f): Scavenger experiments (RhB) of BNO, 0.383BBNO and  $\alpha$ -Bi<sub>2</sub>O<sub>3</sub> under UV-light.

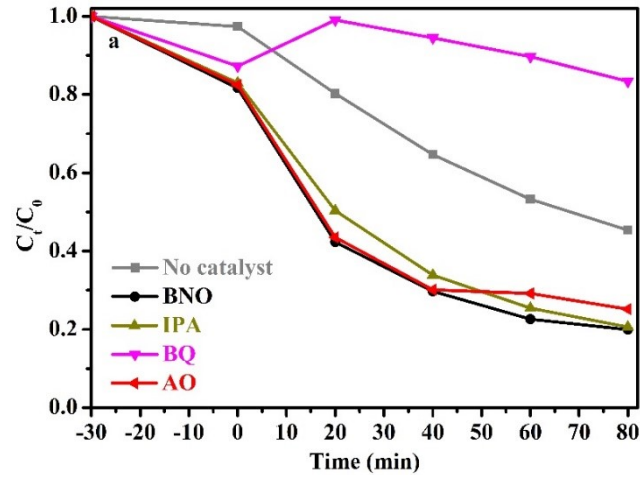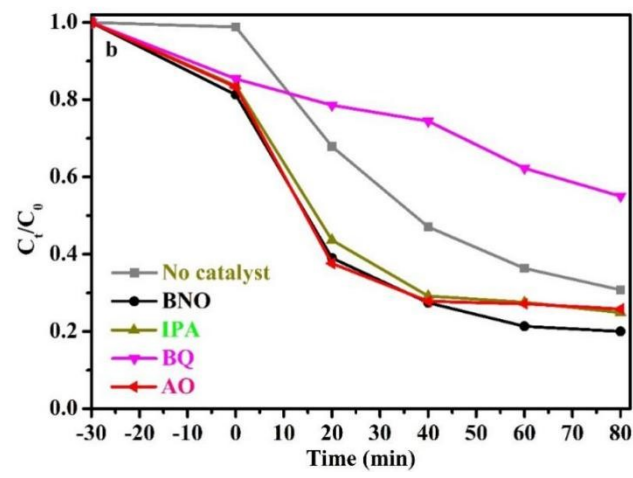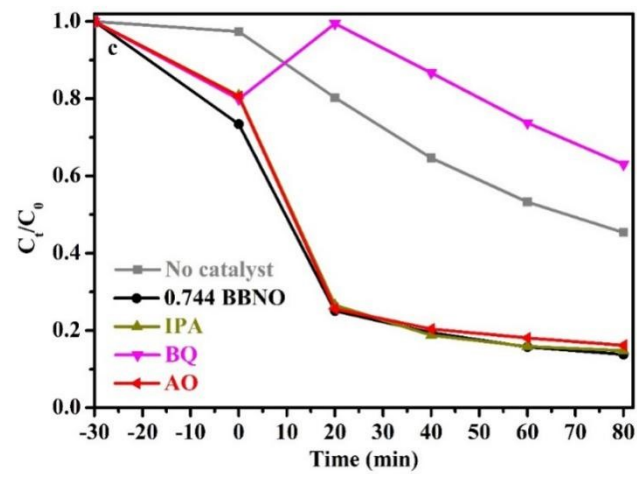

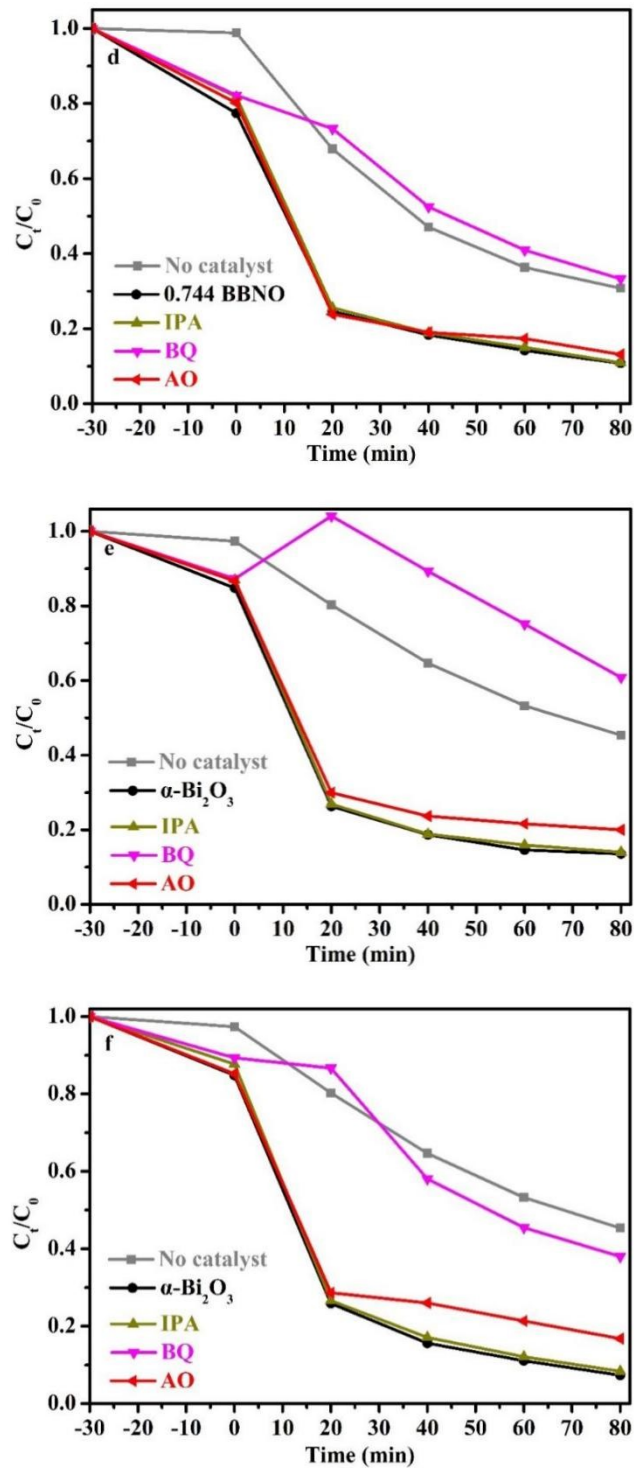

**Fig. S7.** a), c) and e): Scavenger experiments (TC) of BNO, 0.744BBNO and  $\alpha\text{-Bi}_2\text{O}_3$  under Vis-light. b), d) and f): Scavenger experiments (TC) of BNO, 0.744BBNO and  $\alpha\text{-Bi}_2\text{O}_3$  under UV-light.

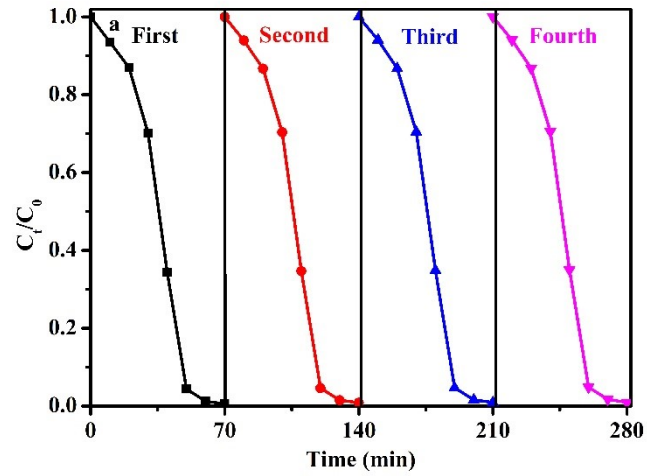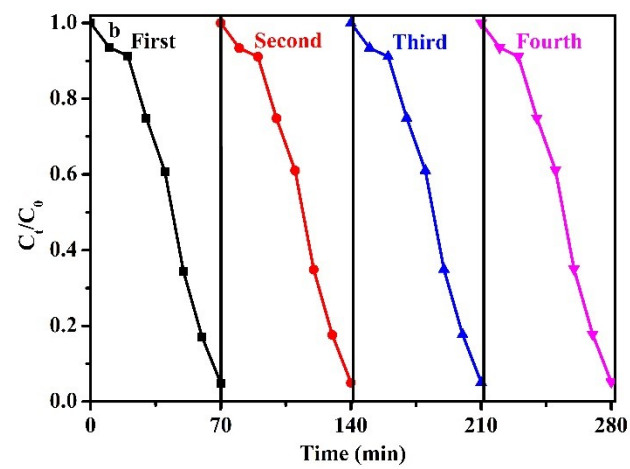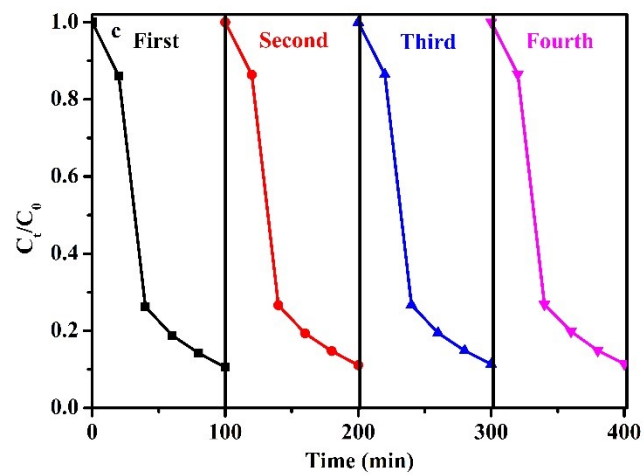

**Fig. S8.** a), b) and c): Cycles test (RhB) of BNO and 0.744BBNO under UV-light. c): Cycles test (TC) of  $\alpha$ - $\text{Bi}_2\text{O}_3$  under UV-light.

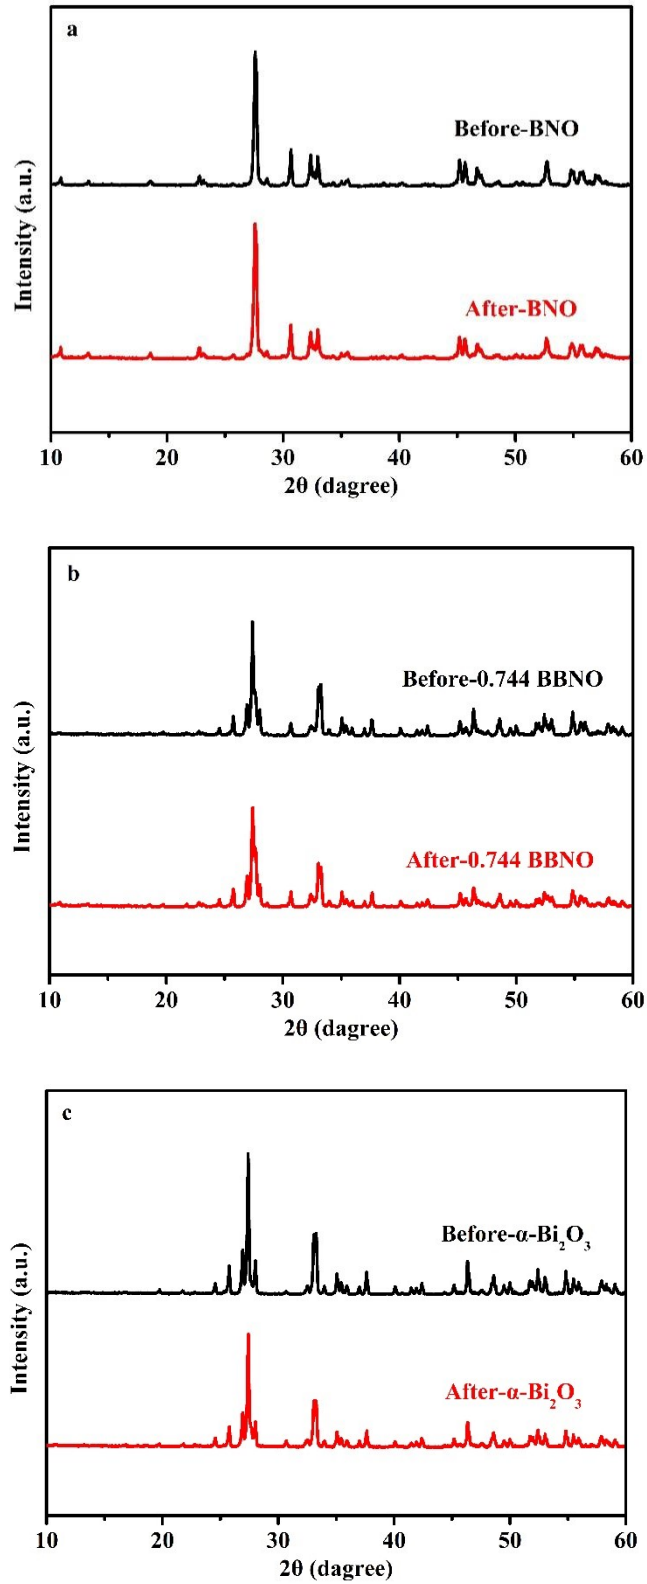

**Fig. S9.** a), b) and c): XRD spectra of reused BNO, 0.744BBNO and  $\alpha$ -Bi<sub>2</sub>O<sub>3</sub>.

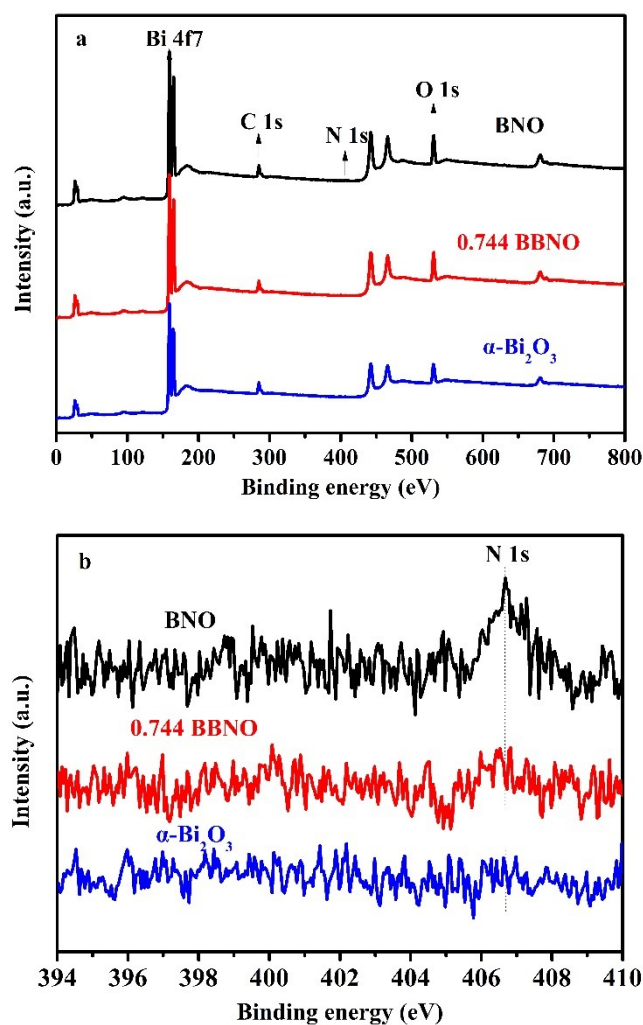

**Fig. S10.** a) XPS spectra and b) N 1s high resolution XPS spectra over reused BNO, 0.744BBNO and  $\alpha$ - $\text{Bi}_2\text{O}_3$  samples.

#### References

1. Y. Y. Wu, H. D. Ji, Q. M. Liu, Z. Y. Sun, P.S. Li, P. R. Ding, M. Guo, X. H. Yi, W. L. Xu, C. C. Wang, S. Gao, Q. Wang, W. Liu and S. W. Chen, Visible Light Photocatalytic Degradation of Sulfanilamide Enhanced by Mo Doping of BiOBr Nanoflowers, *J. Hazard. Mater.*, 2022, **424**, 127563.
2. A. Verma, S. Kumar and Y. P. Fu, A Ternary-hybrid as Efficiently Photocatalytic Antibiotic Degradation and Electrochemical Pollutant Detection, *Chem. Eng. J.*, 2021, **408**, 127290.
3. D. X. Zhao and C. Cai, Preparation of  $\text{Bi}_2\text{MoO}_6/\text{Ti}_3\text{C}_2$  MXene heterojunction photocatalysts for fast tetracycline degradation and Cr(VI) reduction, *Inorg. Chem. Front.*, 2020, **7**, 2799-2808.
4. J. H. Li, J. Ren, Y. J. Hao, E. P. Zhou, Y. Wang, X. J. Wang, R. Su, Y. Liu, X. H. Qi and F. T. Li, Construction of  $\beta$ - $\text{Bi}_2\text{O}_3/\text{Bi}_2\text{O}_2\text{CO}_3$  Heterojunction Photocatalyst for Deep Understanding the Importance of Separation Efficiency and Valence Band Position, *J. Hazard. Mater.*, 2021, **401**, 123262.
5. J. G. Guo, Y. Liu, Y. J. Hao, Y. L. Li, X. J. Wang, R. H. Liu and F. T. Li, Comparison of Importance Between Separation Efficiency and Valence Band Position: The Case of



Heterostructured  $\text{Bi}_3\text{O}_4\text{Br}/\alpha\text{-Bi}_2\text{O}_3$  Photocatalysts, *Appl Catal B: Environ.*, 2018, **224**, 841–853.

6. B. Janania, S. Swetha, A. Syed, A. M. Elgorban, N. S.S. Zaghoul, Ajith M. Thomas, Lija L. Raju and S. S. Khan, Spinel  $\text{FeV}_2\text{O}_4$  coupling on nanocube-like  $\text{Bi}_2\text{O}_3$  for high performance white light photocatalysis and antibacterial applications, *J. Alloy. Compd.*, 2021, **887**, 161432.
